# Supplementary material
Source: PubMed Central journal article supplement (PMC3939041)
Supplement: NIHMS543576-supplement-1.pdf [file NIHMS543576-supplement-1.pdf]

**SUPPLEMENTARY INFORMATION for:**

## Radical SAM enzyme QueE defines a new minimal core fold and metal-dependent mechanism

Daniel P. Dowling<sup>1,2</sup>, Nathan A. Bruender<sup>3</sup>, Anthony P. Young<sup>3</sup>, Reid M. McCarty<sup>3</sup>, Vahe Bandarian<sup>3</sup>, and Catherine L. Drennan<sup>1,2,4,§</sup>

<sup>1</sup>Howard Hughes Medical Institute, Departments of Chemistry<sup>2</sup> and Biology<sup>4</sup>, Massachusetts Institute of Technology, Cambridge, Massachusetts 02139; cdrennan@mit.edu

<sup>3</sup>Department of Chemistry and Biochemistry, University of Arizona, Tucson, AZ 85721

<sup>§</sup>Corresponding author

## SUPPLEMENTARY RESULTS

### Supplementary Fig. 1. Biochemical activity of QueE from *B. multivorans*.

(a) CDG formation over time in presence of 10  $\mu\text{M}$  AdoMet (represented by a gray dashed line) showing that AdoMet is used catalytically. (b) CDG formation was monitored over time by HPLC analysis with either 0 mM or 2 mM added  $\text{Mg}^{2+}$ , showing an  $\sim 3$ -fold increase in the rate of product formation with added divalent cation. Basal level of activity without  $\text{Mg}^{2+}$  is likely due to the presence of  $\text{Mg}^{2+}$  from the protein purification. (c) The  $k_{\text{cat}}$  for CDG formation was determined using saturating concentrations of CPH<sub>4</sub>,  $\text{Mg}^{2+}$ , and AdoMet and varying concentrations of QueE (2, 4, 7, and 10  $\mu\text{M}$ ). (d) *B. multivorans* QueE is more active with dithionite (DT) versus the *E. coli* flavodoxin/flavodoxin reductase/NADPH system (FPR/FldA); therefore all assays were performed using dithionite as reductant. All data represent mean value of three replicates  $\pm$  s.d.

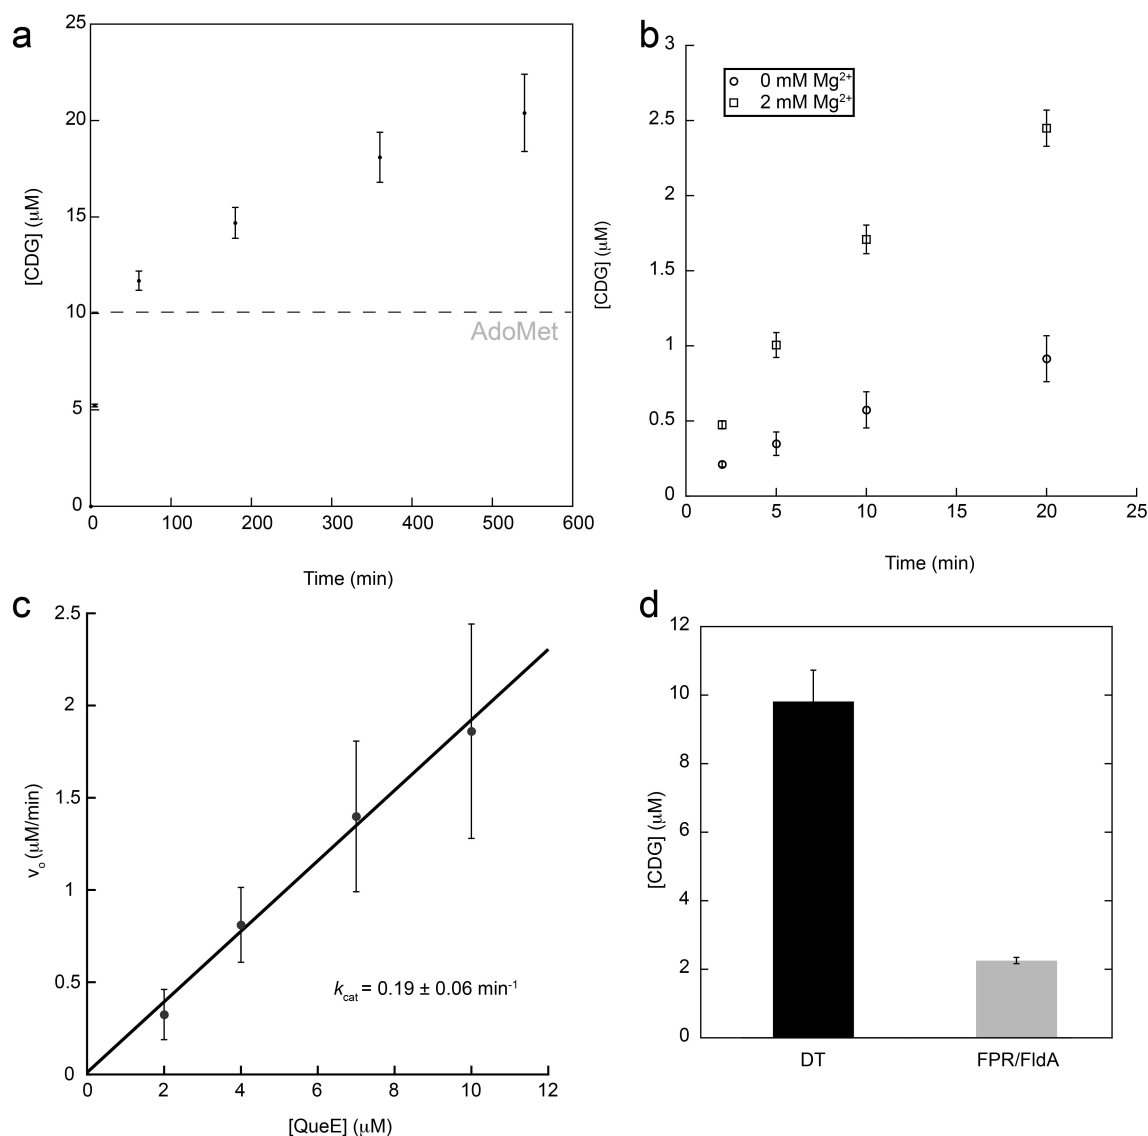



**Supplementary Fig. 3. Solution studies of *B. multivorans* QueE.**

Anaerobic size exclusion chromatogram of QueE on a Sephacryl S-200 column in 50 mM PIPES (pH 7.4) and 10 mM DTT. **(a)** A calibration curve was generated with a mixture of thyroglobulin (bovine, 670 kDa),  $\gamma$ -globulin (bovine, 158 kDa), ovalbumin (chicken, 44 kDa), myoglobin (horse, 17 kDa), and vitamin B<sub>12</sub> (1.35 kDa). **(b)** *B. multivorans* QueE has a retention time consistent with a ~51 kDa homodimer. **(c)** In co-elution experiments with standards in **(a)**, QueE coelutes with ovalbumin (44 kDa) at 60.4 min. Each chromatogram is a result of a single injection.

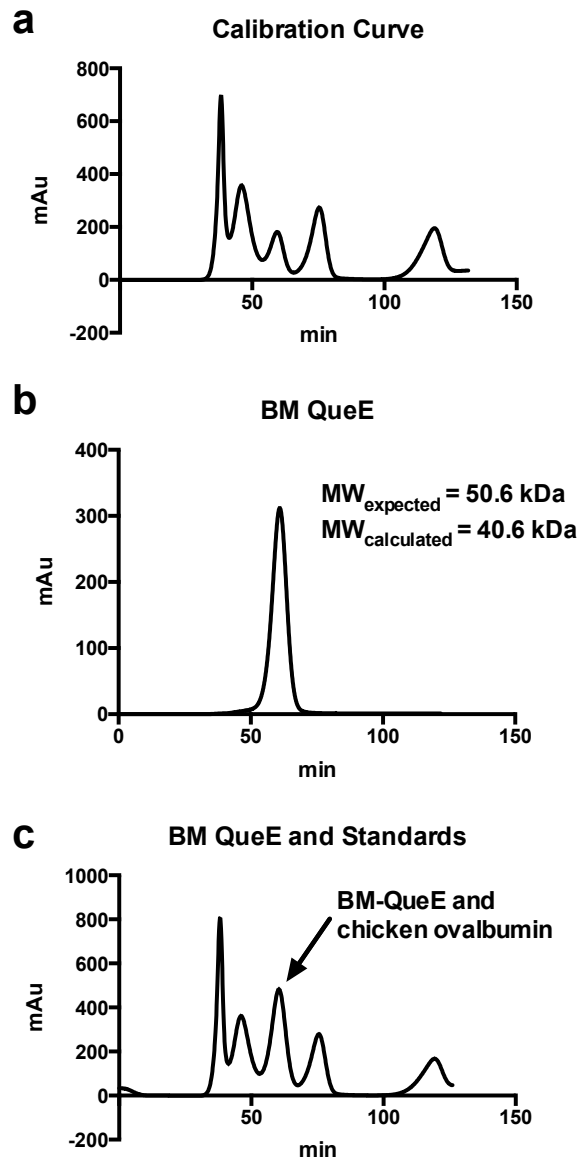

**Supplementary Fig. 4. Stereoviews showing loops L3 and L4.**

Helices  $\alpha3$  and  $\alpha4$  of the standard AdoMet radical protein core are replaced with two loops in QueE. (a) Ribbon stereoview depiction of one molecule of QueE, colored blue to red for B-factor values ranging from 25 to 59  $\text{\AA}^2$ .  $\alpha$ -Helices and the  $3_{10}$ H1' helix in the cluster-binding loop are labeled to orient the molecule. (b) Stereoview depiction of the L3 and L4 loops, which bury hydrophobic residues against their respective  $\beta$ -strands from the protein core. Protein carbons are colored as follows:  $\beta3$  and L3, yellow;  $\beta4$  and L4, light blue; and  $\beta5$ , red.

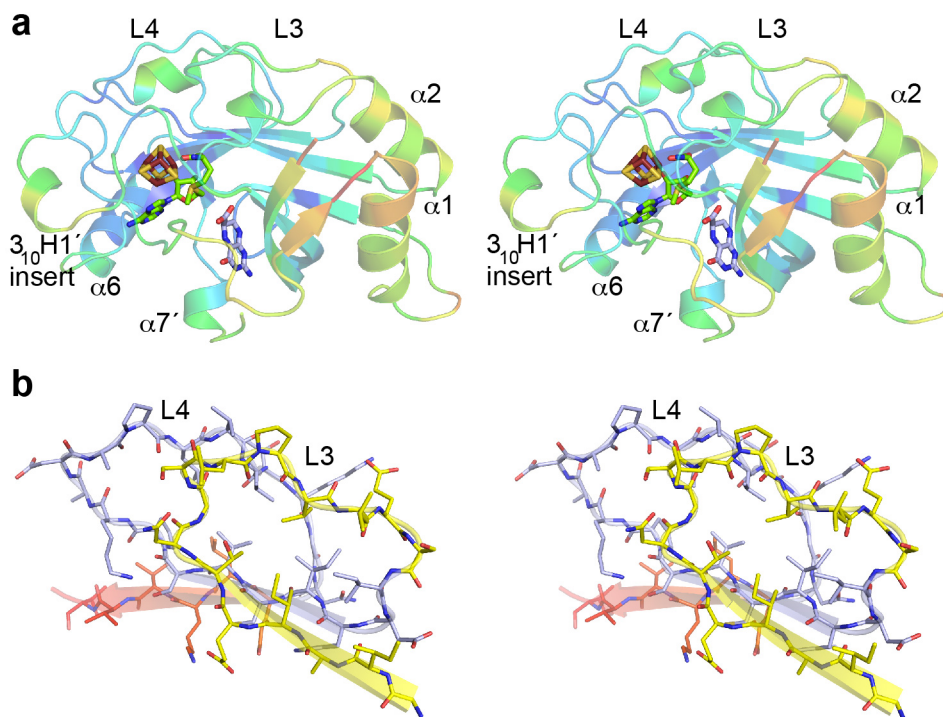

**Supplementary Fig. 5. Cluster-binding loop insertion in QueE and comparison to the traditional CX<sub>3</sub>CXΦC motif as observed in PFL-AE.**

(a) Representation of the CX<sub>14-20</sub>CX<sub>1-2</sub>ΦC, determined from 334 proteobacterial protein sequences. Figure was generated using [weblogo.berkeley.edu](http://weblogo.berkeley.edu). Stereoview images of the cluster-binding loops from (b) QueE and (c) PFL-AE (PDB ID 3CB8)<sup>1</sup>, accentuating the high degree to which the cluster of QueE is buried in comparison to enzymes with the more common CX<sub>3</sub>CXΦC motif. (d) Overlay of the partial β-barrels of QueE with PFL-AE, depicting the β1'-loop-β1 segments of both proteins. (e) Close-up depiction of the [4Fe-4S] coordination environment of QueE and PFL-AE. The cluster loop insertion positions Cys46 differently, but the sulfur of this cysteine superimposes with the cysteine sulfur of PFL-AE<sup>2</sup>. QueE is colored in gray, yellow, and orange for N-terminal, core, and C-terminal residues, respectively, with the 3<sub>10</sub> helical insert in purple. PFL-AE is colored cyan. Ligand carbons are colored as follows: AdoMet, green; CPH<sub>4</sub>, light blue; and PFL-AE substrate peptide, magenta. [4Fe-4S] atoms are ruby and yellow, respectively.

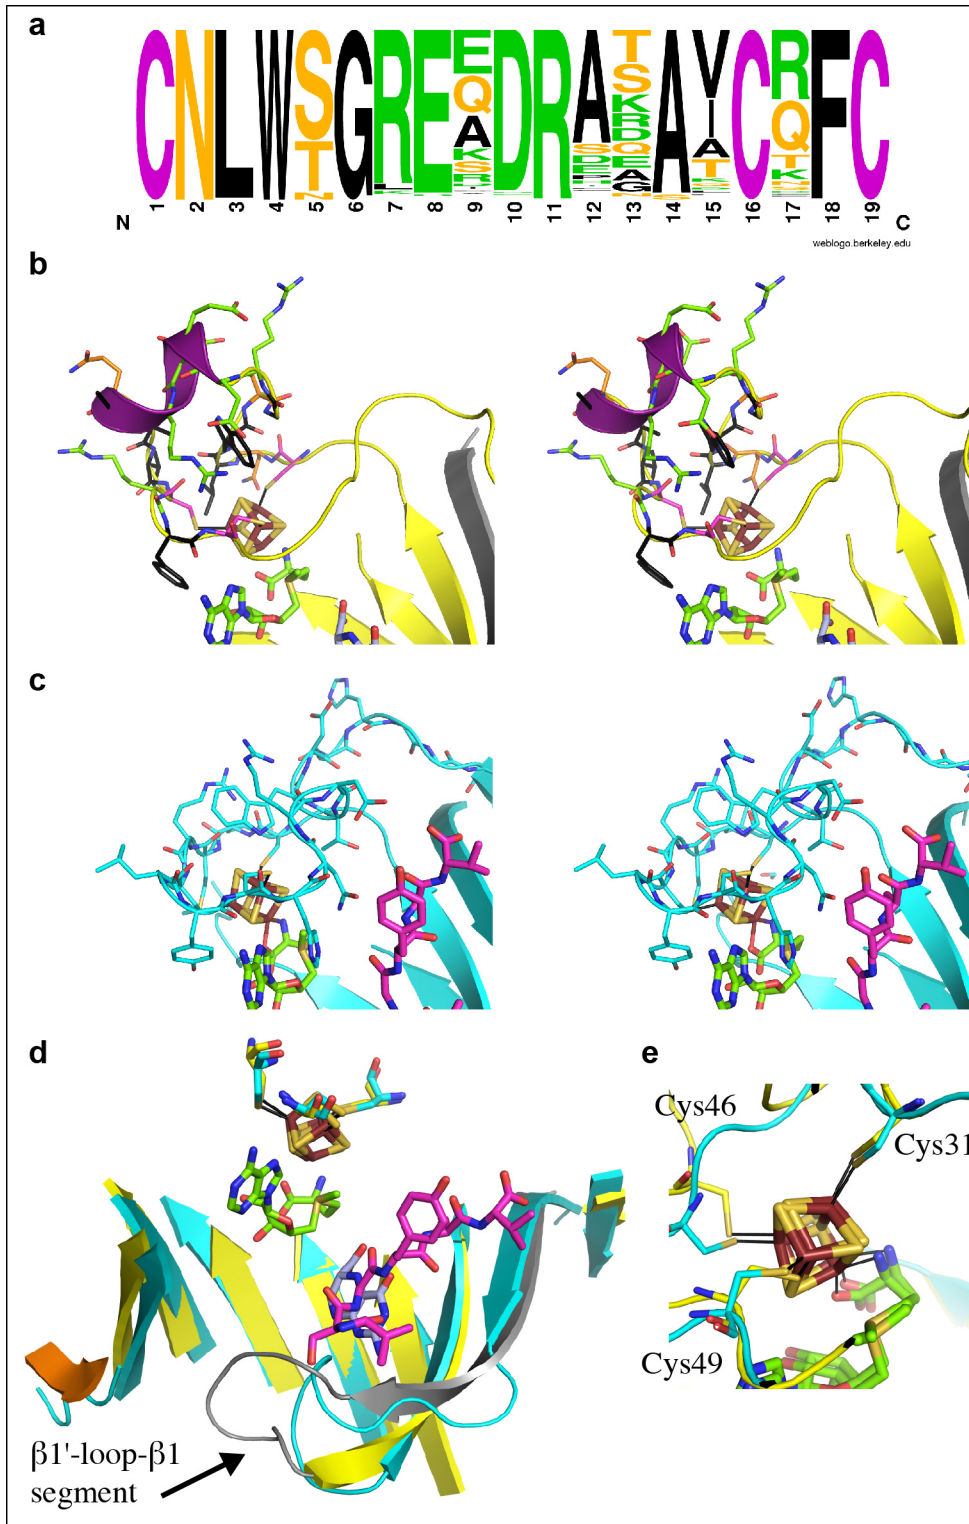

**Supplementary Fig. 6. Sequence similarity network of the AdoMet radical superfamily and 7-carboxy-7-deazaguanine synthases.**

**(a)** Protein sequence similarity network of the AdoMet radical superfamily, in which separate nodes (gray) represent protein sequences with at least 40% sequence identity; connections are filtered at  $10^{-28}$  Blast Probability. Nodes that contain QueE-like sequences are colored cyan. **(b)** Blow-up of QueE sequence space containing 1589 protein sequences, with node connections filtered at  $10^{-40}$  Blast Probability. Nodes in the QueE-like subfamily are colored as follows: blue, sequences annotated as 7-carboxy-7-deazaguanine synthases; gray, unclassified sequences; white, sequences annotated as ExsD. The gene product ExsD has been predicted to be involved in pterin biosynthesis<sup>3</sup>. The *B. multivorans* and *B. subtilis* QueE sequences are labeled as magenta and yellow diamonds, respectively, depicting the separate grouping of QueE sequences that contain the  $CX_{14}CX\Phi C$  motif observed in *B. multivorans* compared to the traditional  $CX_3CX\Phi C$  motif.

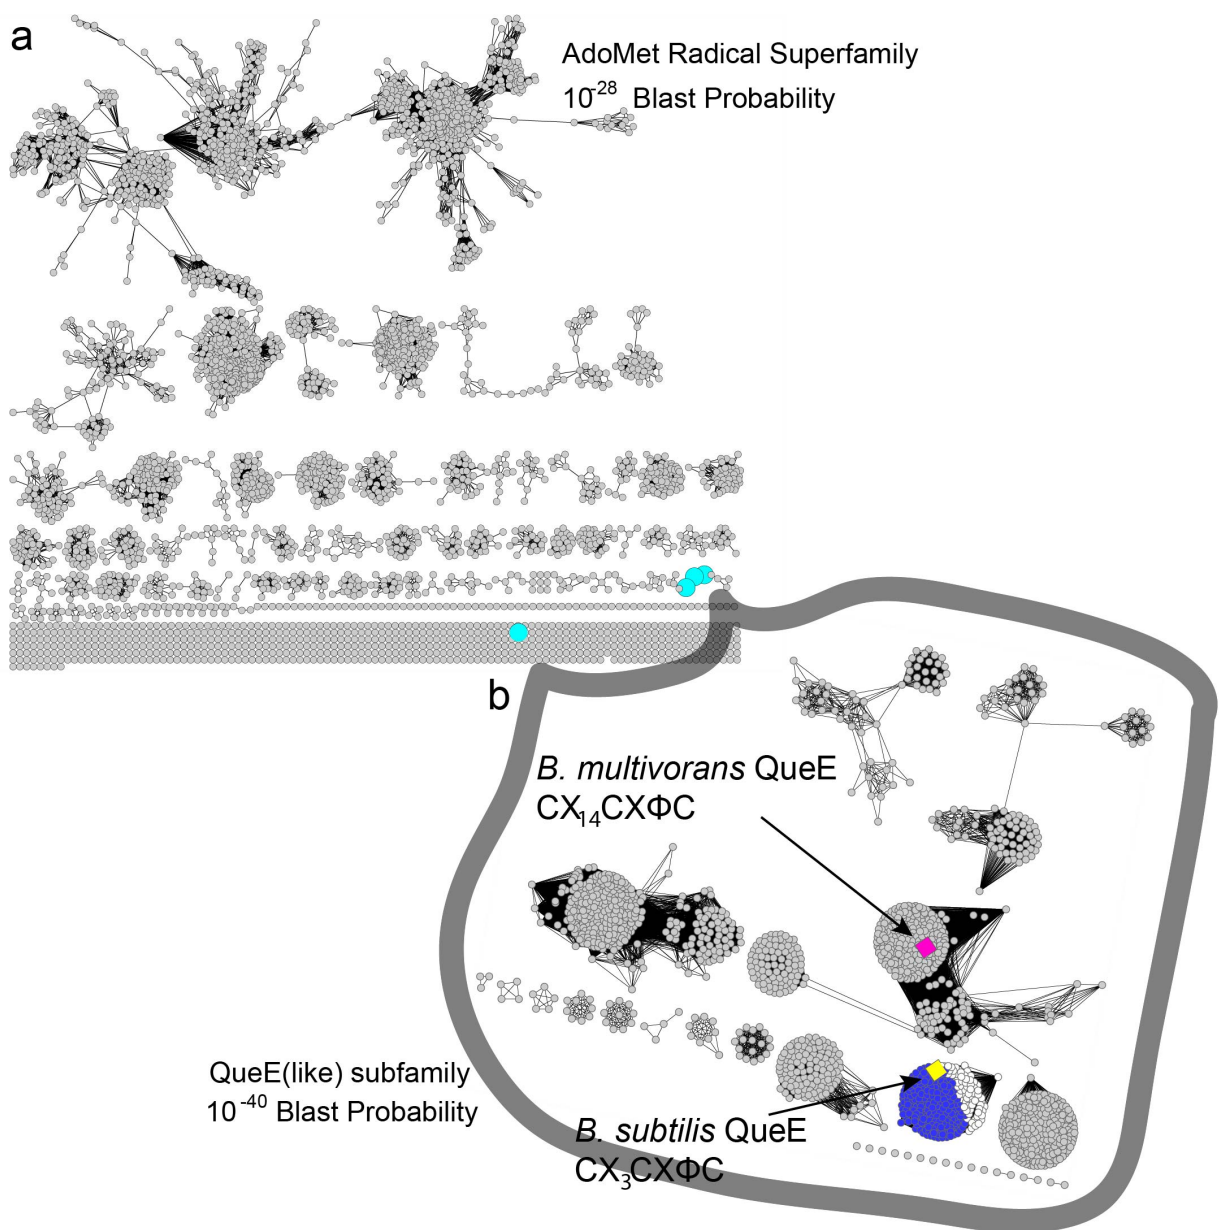



**Supplementary Fig. 7. QueE electrostatic calculations in comparison with PFL-AE.**

Electrostatic, solvent accessible surface representations of (a) QueE and (b) PFL-AE (PDB entry 3C8F)<sup>1</sup> are displayed on the left, with the corresponding ribbon depiction shown on the right. Loops proposed to be involved in binding external reductants<sup>1,2,4,5</sup>, such as flavodoxin, are colored cyan and labeled. Electrostatic potentials are depicted on a colorimetric scale from red to blue for  $-1$  to  $+1$   $\text{kT e}^{-1}$ .

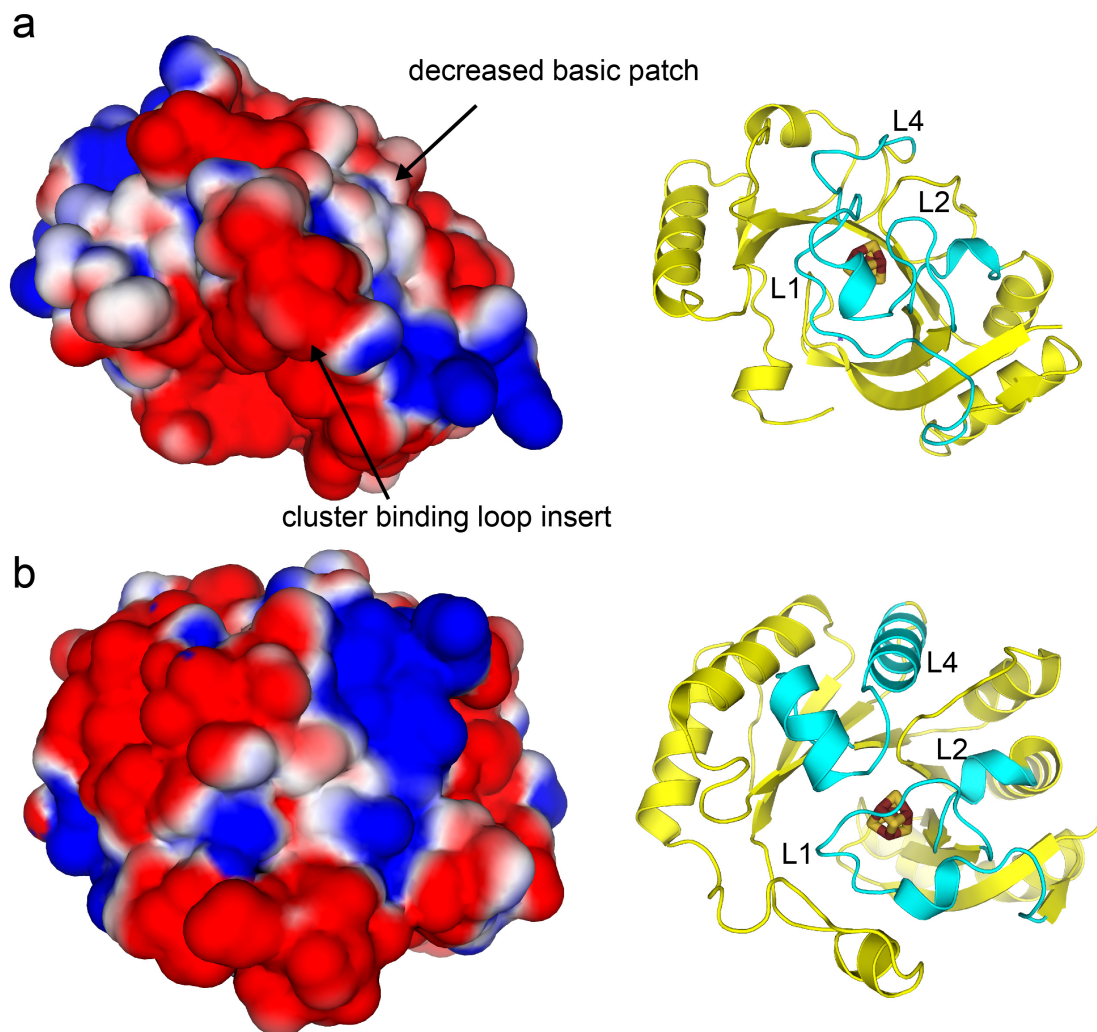

**Supplementary Fig. 8. Stereoview of AdoMet binding in *B. multivorans* QueE.**

Residues that interact with AdoMet are displayed as sticks. AdoMet and 6CP carbon atoms are colored green and light blue, respectively. The protein backbone is displayed as ribbons; the AdoMet radical core is colored in yellow for loops and strands and purple for helices. The cluster-binding loop is colored cyan. The N- and C-terminal extensions of the protein core are colored gray and orange, respectively. [4Fe-4S] cluster atoms are ruby and yellow, respectively. Coordination bonds to the iron-sulfur cluster are displayed as solid black lines. Protein-ligand interactions are represented as magenta dashed lines, and the protein hydrogen-bonding network located above the plane of the adenine is displayed as dashed gray lines.

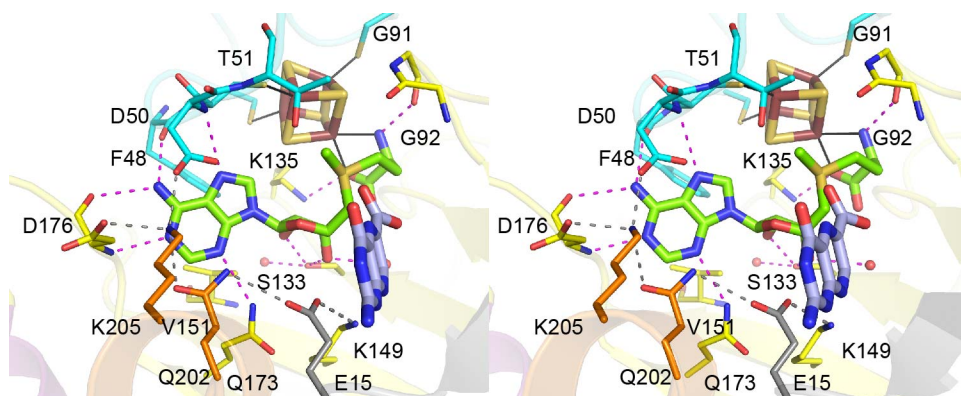

**Supplementary Fig. 9. Composite omit electron density for QueE ligands and the cluster loop insertion sequence.**

(a) CX<sub>14</sub>CXΦC motif and cofactors at 1.9 Å resolution. (b) 2.6 Å resolution structure with 6CP and AdoMet bound. (c) 1.9 Å resolution structure with CDG, Mg<sup>2+</sup> and AdoMet bound. (d) 2.2 Å resolution structure with CPH<sub>4</sub>, Mg<sup>2+</sup> and AdoMet bound. (e) 1.9 Å resolution structure with CPH<sub>4</sub>, Na<sup>+</sup> and AdoMet bound. (f) 2.7 Å resolution structure with CPH<sub>4</sub>, Mn<sup>2+</sup> and AdoMet. The protein backbone is displayed as ribbons in (a) only; the AdoMet radical core is colored in yellow for loops and strands and purple for helices. The cluster-binding loop is colored cyan. The N- and C-terminal extensions of the protein core are colored gray and orange, respectively. Ligand carbons are colored as follows: AdoMet, green; 6CP, CDG and CPH<sub>4</sub>, light blue; Mg<sup>2+</sup>, green; Na<sup>+</sup>, purple; and Mn<sup>2+</sup>, pink. [4Fe-4S] atoms are ruby and yellow, respectively. Composite omit electron density (2Fo-Fc) at 1σ is displayed as gray mesh.

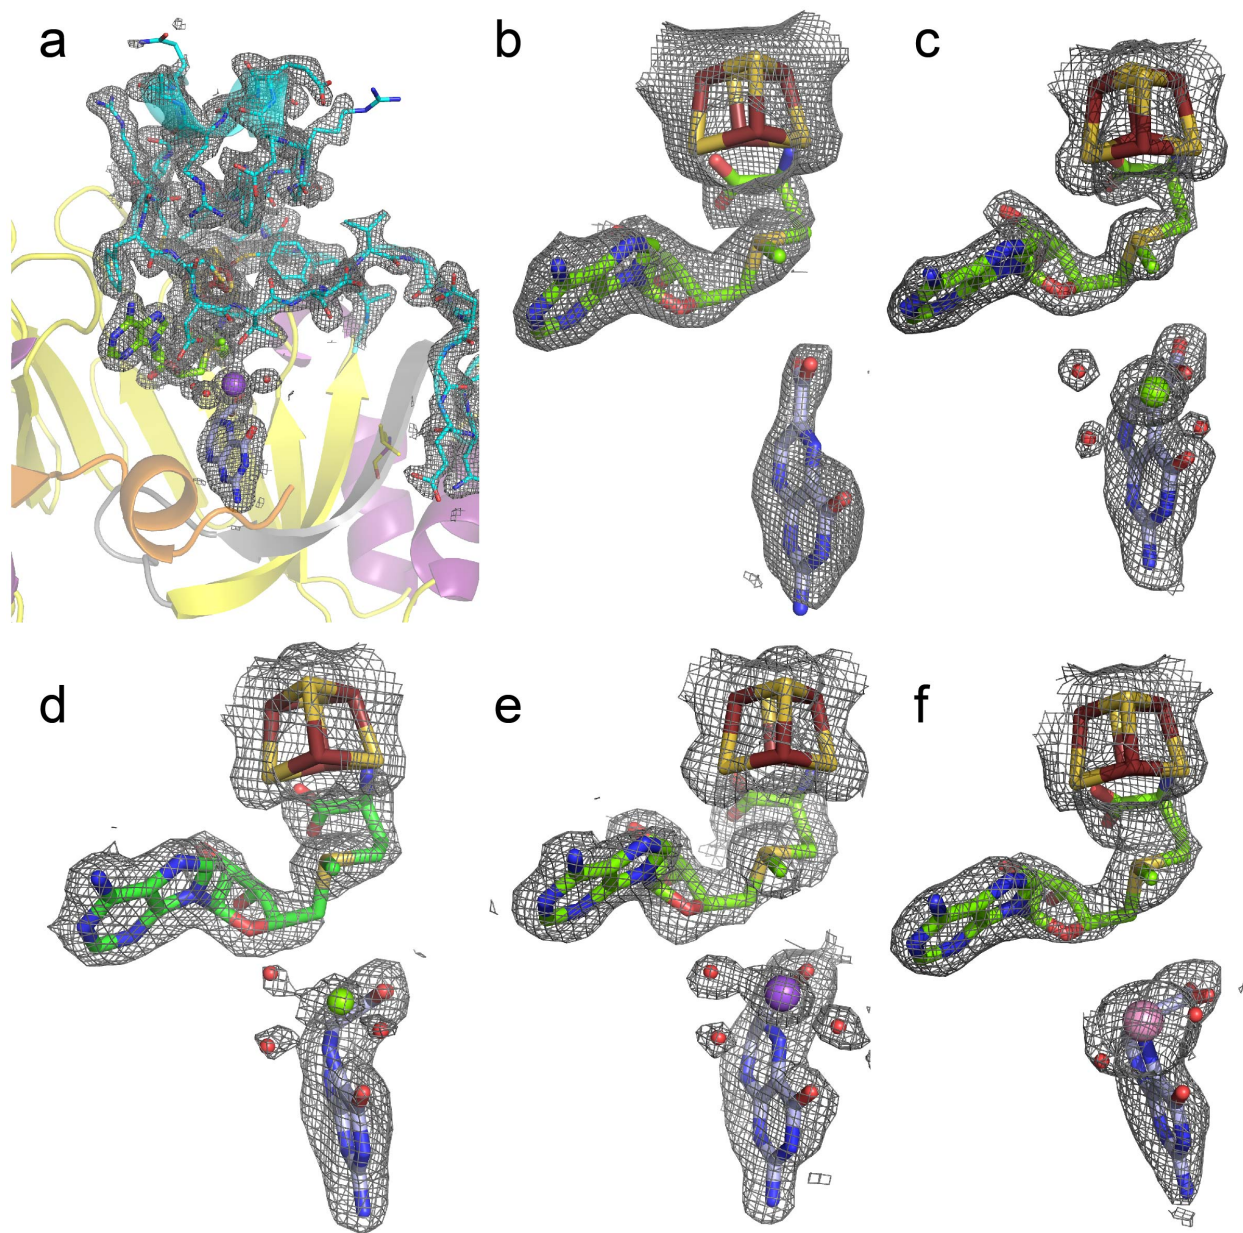

**Supplementary Fig. 10. Solvent access to the enzyme active site of QueE from *B. multivorans*.**

**(a)** Crystal structure of QueE with AdoMet and 6CP. **(b)** Crystal structure of QueE complexed with AdoMet, CPH<sub>4</sub>, and a Mg<sup>2+</sup> ion. Protein is colored yellow with gray accessible surface area displayed. AdoMet and CPH<sub>4</sub> are displayed with green and blue carbon atoms, respectively, and Mg<sup>2+</sup> is shown as a green sphere. The [4Fe-4S] cluster is displayed as ruby and yellow sticks for iron and sulfur, respectively.

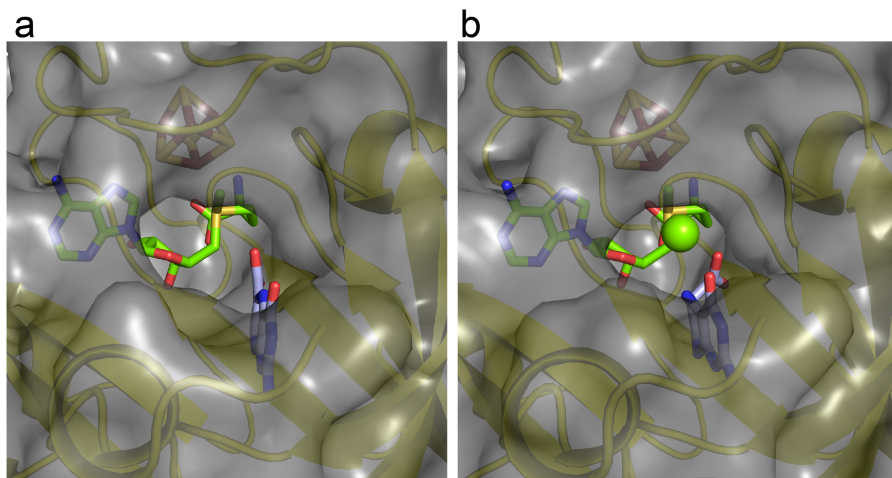

**Supplementary Fig. 11. Anomalous electron density maps for  $Mn^{2+}$ -QueE.**

Anomalous electron density (based on data collected at wavelength of 1.7399 Å) shows two  $Mn^{2+}$  binding sites per monomer in QueE. One  $Mn^{2+}$  is bound in the active site; the other is bound on the surface of the protein, where it interacts with the carboxylate of D52 in a monodentate fashion. Anomalous electron density map is colored magenta and contoured at  $3\sigma$ . The QueE dimer is depicted in ribbons, with separate molecules colored yellow and gray. The cluster-binding loop of each molecule is colored cyan. AdoMet and CPH<sub>4</sub> carbon atoms are colored green and blue, respectively. Iron and sulfur of the clusters are colored ruby and yellow, respectively.

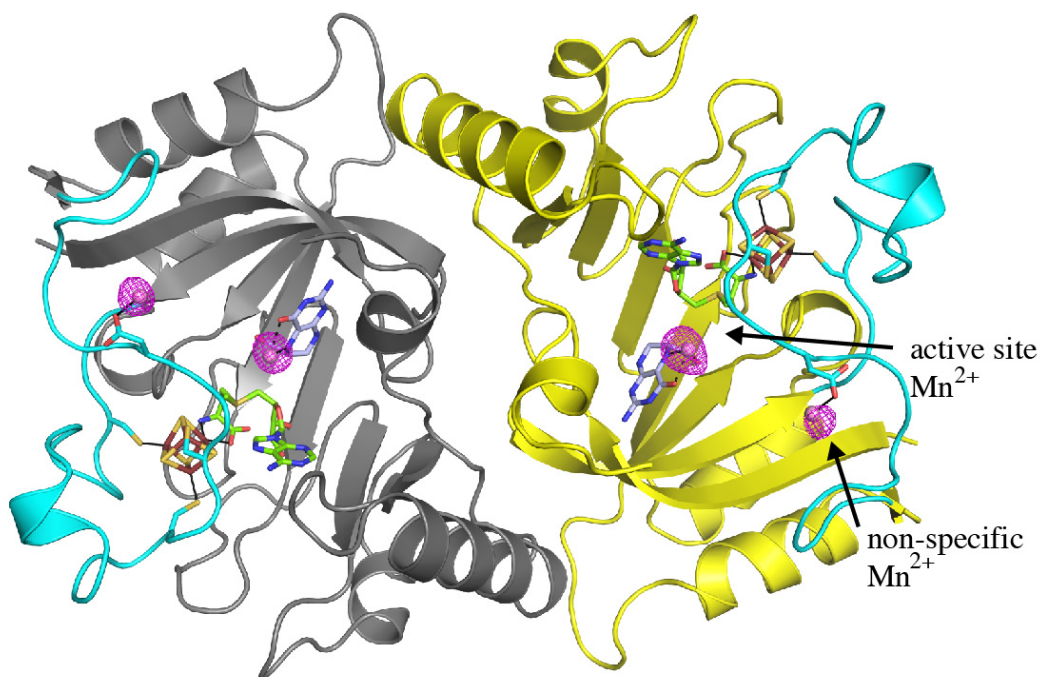

**Supplementary Fig. 12. *B. multivorans* QueE gene and protein sequence.**

(a) Nucleotide and (b) protein sequence for recombinant codon optimized *B. multivorans* QueE. The nucleotide sequences in bold represent the *Nde*I and *Hind*III restriction endonuclease sites that were used to clone the gene into the corresponding sites in pET28a. The start and stop codons are shown in *italic*. The underlined sequence corresponds to the His<sub>6</sub> tag.

(a)

ATGGGCAGCAGCCATCATCATCATCACAGCAGCGGCCTGGTGCCGCGCGGCAGCC**CATATGA**  
CCTACGCTGTGAAAGAAATCTTTTATACGCTGCAGGGTGAAGGCGCTAATGCGGGTTCGTCGGC  
GGTGTTCGTTTGTGCGTTTGGCCGGCTGCAACCTGTGGAGCGGTTCGTGAAGAAGATCGCGCACAGGCT  
GTGTGCCGTTTTTGTGATACCGACTTCGTTGGCACGGATGGTGAAAATGGCGGTAAATTTAAAG  
ATGCAGACGCCCTGGTTGCGACCATTCGAGGTCTGTGGCCGGCAGGTGAAGCTCATCGCTTCGT  
GGTTTGCACGGGCGGTGAACCGATGCTGCAGCTGGATCAACCGCTGGTCGACGCACTGCACGCA  
GCAGGTTTTGGTATTGCGATCGAAACCAACGGCAGCCTGCCGGTCTTGAATCTATTGATTGGA  
TCTGTGTGAGTCCGAAAGCAGACGCTCCGCTGGTCGTGACGAAGGGTAACGAACCTGAAAGTTGT  
CATTCCGCAGGATAATCAACGTCTGGCGGATTATGCCAAACTGGACTTTGAATACTTCCTGGTG  
CAACCGATGGATGGCCCGTCCC GCGACCTGAATACCAA ACTGGCCATCGATTGGTGTAAACGTC  
ATCCGCAGTGGCGTCTGTCAATGCAAACCCATAAATACCTGAACATCCCGT**GAT****AAGCTT**

(b)

MGSSHHHHHSSGLVPRGSHMTYAVKEIFYTLQEGEGANAGRPVFCRFAGCNLWSGREEDRAQA  
VCRFCDTDFVGTGGENGGKFKDADALVATIAGLWPAGEAHRFVCTGGEPMLQLDQPLVDALHA  
AGFGIAIETNGSLPVLESIDWICVSPKADAPLVVTKGNELKVVI PQDNQRLADYAKLDFEYFLV  
QPMDGPSRDLN TKLAIDWCKRHPQWRLSMQTHKYLNI P

**Supplementary Table 1** Data collection, phasing and refinement statistics for Fe-SAD structure of QueE from *B. multivorans*.

|                                     |                 | AdoMet<br>6CP       |
|-------------------------------------|-----------------|---------------------|
| <b>Data collection #</b>            |                 |                     |
| Space group                         |                 | $P 4_3 2_1 2$       |
| Cell dimensions                     |                 |                     |
| <i>a, b, c</i> (Å)                  |                 | 119.0, 119.0, 102.0 |
| $\alpha, \beta, \gamma$ (°)         |                 | 90, 90, 90          |
|                                     | <u>Native</u>   | <u>Peak</u>         |
| Wavelength                          | 0.990           | 1.54178             |
| Resolution (Å)                      | 47.2-2.6        | 33.0-2.9            |
| $R_{\text{sym}}$                    | 0.067 (0.536) * | 0.105 (0.482)       |
| $I / \sigma I$                      | 18.0 (2.5)      | 21.1 (4.9)          |
| Completeness (%)                    | 99.0 (99.4)     | 99.8 (100)          |
| Redundancy                          | 3.6 (3.6)       | 7.6 (7.4)           |
| <b>Refinement</b>                   |                 |                     |
| Resolution (Å)                      | 47.2-2.6        |                     |
| No. reflections                     | 22,885          |                     |
| $R_{\text{work}} / R_{\text{free}}$ | 0.176 / 0.208   |                     |
| No. atoms                           |                 |                     |
| Protein                             | 3285            |                     |
| Ligand/ion                          | 115             |                     |
| Water                               | 103             |                     |
| <i>B</i> -factors (Å <sup>2</sup> ) |                 |                     |
| Protein                             | 54.3            |                     |
| Ligand/ion                          | 50.4            |                     |
| Water                               | 48.1            |                     |
| R.m.s deviations                    |                 |                     |
| Bond lengths (Å)                    | 0.002           |                     |
| Bond angles (°)                     | 0.6             |                     |

# Each dataset was collected on a single crystal. \*Highest-resolution shell is shown in parentheses.

**Supplementary Table 2** Data collection and refinement statistics for QueE from *B. multivorans* (molecular replacement).

|                                                     | AdoMet<br>CPH <sub>4</sub><br>Na <sup>+</sup> | AdoMet<br>CPH <sub>4</sub><br>Mg <sup>2+</sup> | AdoMet<br>CPH <sub>4</sub><br>Mn <sup>2+</sup> & | AdoMet<br>CDG<br>Mg <sup>2+</sup>        |
|-----------------------------------------------------|-----------------------------------------------|------------------------------------------------|--------------------------------------------------|------------------------------------------|
| <b>Data collection #</b>                            |                                               |                                                |                                                  |                                          |
| Space group                                         | <i>P</i> 4 <sub>3</sub> 2 <sub>1</sub> 2      | <i>P</i> 4 <sub>3</sub> 2 <sub>1</sub> 2       | <i>P</i> 4 <sub>3</sub> 2 <sub>1</sub> 2         | <i>P</i> 4 <sub>3</sub> 2 <sub>1</sub> 2 |
| Cell dimensions                                     |                                               |                                                |                                                  |                                          |
| <i>a</i> , <i>b</i> , <i>c</i> (Å)                  | 119.1, 119.1, 103.4                           | 119.1, 119.1, 104.3                            | 119.2, 119.2, 105.3                              | 118.58, 118.8, 102.7                     |
| α, β, γ (°)                                         | 90, 90, 90                                    | 90, 90, 90                                     | 90, 90, 90                                       | 90, 90, 90                               |
| Resolution (Å)                                      | 39.0-1.9                                      | 28.9-2.2                                       | 48.2-2.7                                         | 47.2-1.91                                |
| <i>R</i> <sub>sym</sub>                             | 0.093 (0.565) *                               | 0.102 (0.459)                                  | 0.076 (0.551)                                    | 0.054 (0.575)                            |
| <i>I</i> / σ <i>I</i>                               | 15.7 (2.8)                                    | 12.1 (3.7)                                     | 27.7 (3.9)                                       | 29.2 (2.8)                               |
| Completeness (%)                                    | 99.0 (99.9)                                   | 99.6 (99.7)                                    | 99.9 (99.6)                                      | 96.8 (94.7)                              |
| Redundancy                                          | 4.6 (4.6)                                     | 4.2 (4.1)                                      | 8.6 (8.3)                                        | 5.4 (5.5)                                |
| <b>Refinement</b>                                   |                                               |                                                |                                                  |                                          |
| Resolution (Å)                                      | 39.0-1.9                                      | 28.9-2.2                                       | 48.2-2.7                                         | 47.2-1.91                                |
| No. reflections                                     | 56302                                         | 38352                                          | 39665                                            | 55489                                    |
| <i>R</i> <sub>work</sub> / <i>R</i> <sub>free</sub> | 0.145 / 0.174                                 | 0.156 / 0.180                                  | 0.165 / 0.203                                    | 0.152 / 0.184                            |
| No. atoms                                           |                                               |                                                |                                                  |                                          |
| Protein                                             | 3304                                          | 3291                                           | 3286                                             | 3302                                     |
| Ligand/ion                                          | 114                                           | 113                                            | 104                                              | 112                                      |
| Water                                               | 558                                           | 308                                            | 69                                               | 446                                      |
| <i>B</i> -factors (Å <sup>2</sup> )                 |                                               |                                                |                                                  |                                          |
| Protein                                             | 29.5                                          | 39.7                                           | 51.5                                             | 38.1                                     |
| Ligand/ion                                          | 26.3                                          | 38.7                                           | 61.7                                             | 32.6                                     |
| Water                                               | 41.4                                          | 44.6                                           | 45.2                                             | 45.5                                     |
| R.m.s. deviations                                   |                                               |                                                |                                                  |                                          |
| Bond lengths (Å)                                    | 0.013                                         | 0.010                                          | 0.003                                            | 0.017                                    |
| Bond angles (°)                                     | 1.4                                           | 1.2                                            | 0.8                                              | 1.6                                      |

# Each dataset was collected from a single crystal. & Friedel mates not merged for the Mn<sup>2+</sup> - dataset. \*Highest-resolution shell is shown in parentheses.



**Supplementary Table 3** Structural comparison of QueE from *B. multivorans* to other AdoMet radical enzyme structures.

RMSD values are calculated using the DALI server<sup>6</sup>.

| <b>AdoMet radical family member</b>      | <b>PDB entry</b> | <b>RMSD (Å)</b> | <b>Ca atoms aligned</b> | <b>% Sequence identity</b> |
|------------------------------------------|------------------|-----------------|-------------------------|----------------------------|
| pyruvate formate-lyase activating enzyme | 3C8F             | 2.7             | 171                     | 17                         |
| lysine 2,3-aminomutase                   | 2A5H             | 3.3             | 166                     | 13                         |
| RlmN                                     | 4RF9             | 3.3             | 166                     | 17                         |
| spore photoproduct lyase                 | 4FHC             | 3.5             | 156                     | 10                         |
| TYW1                                     | 2YX0             | 3.3             | 163                     | 17                         |
| MoaA                                     | 2FB2             | 3.4             | 159                     | 17                         |
| HydE                                     | 3CIW             | 4.0             | 156                     | 11                         |
| coproporphyrinogen III oxidase           | 1OLT             | 4.0             | 156                     | 13                         |
| biotin sythase                           | 1R30             | 4.0             | 158                     | 11                         |
| ThiC                                     | 3EPM             | 4.6             | 134                     | 7                          |
| methyl ornithine synthase                | 3T7V             | 3.8             | 147                     | 14                         |

**Supplementary Table 4 Metal ion distances and substrate dihedral angles.**

Water molecules are labeled in **Figure 4**. Values indicated are in angstroms (Å) for distances or degrees (°) for dihedrals for both molecules of the QueE dimer.

|                                      | <b>CPH<sub>4</sub><br/>C4=O</b> | <b>CPH<sub>4</sub><br/>C6-COOH</b> | <b>H<sub>2</sub>O-A</b> | <b>H<sub>2</sub>O-B</b> | <b>H<sub>2</sub>O-C</b> | <b>T51<br/>Oγ1</b> | <b>CPH<sub>4</sub><br/>N5</b> | <b>CPH<sub>4</sub><br/>C4a-N5-C6-C</b> |
|--------------------------------------|---------------------------------|------------------------------------|-------------------------|-------------------------|-------------------------|--------------------|-------------------------------|----------------------------------------|
| AdoMet                               | 3.0                             | 2.8                                | 2.4                     | 2.8                     | 3.2                     | 2.9                | 2.9                           | -99°                                   |
| CPH <sub>4</sub><br>Mg <sup>2+</sup> | 3.0                             | 3.0                                | 2.8                     | 2.7                     | 3.3                     | 2.8                | 3.0                           | -96°                                   |
| AdoMet                               | 3.3                             | 2.9                                | 2.7                     | 2.8                     | 2.8                     | 2.8                | 2.9                           | -145°                                  |
| CPH <sub>4</sub><br>Na <sup>+</sup>  | 3.4                             | 2.9                                | 2.8                     | 2.7                     | 2.9                     | 2.8                | 2.9                           | -145°                                  |
| AdoMet                               | 2.6                             | 3.1                                | -                       | 2.3                     | 3.0                     | 3.4                | 2.0                           | -84°                                   |
| CPH <sub>4</sub><br>Mn <sup>2+</sup> | 2.7                             | 3.4                                | -                       | 2.5                     | 2.4                     | 3.7                | 2.0                           | -82°                                   |

  

|                         | <b>CDG<br/>C6=O</b> | <b>CDG<br/>C7-COOH</b> | <b>H<sub>2</sub>O-A</b> | <b>H<sub>2</sub>O-B</b> | <b>H<sub>2</sub>O-C</b> | <b>T51<br/>Oγ1</b> |
|-------------------------|---------------------|------------------------|-------------------------|-------------------------|-------------------------|--------------------|
| AdoMet                  | 2.9                 | 2.4                    | 3.0                     | 2.8                     | 2.9                     | 2.9                |
| CDG<br>Mg <sup>2+</sup> | 2.9                 | 2.3                    | 3.0                     | 2.6                     | 3.1                     | 3.0                |

## References

1. Vey, J.L. et al. Structural basis for glycyl radical formation by pyruvate formate-lyase activating enzyme. *Proc. Natl. Acad. Sci. USA* **105**, 16137-16141 (2008).
2. Vey, J.L. & Drennan, C.L. Structural insights into radical generation by the radical SAM superfamily. *Chem. Rev.* **111**, 2487-2506 (2011).
3. Sofia, H.J., Chen, G., Hetzler, B.G., Reyes-Spindola, J.F. & Miller, N.E. Radical SAM, a novel protein superfamily linking unresolved steps in familiar biosynthetic pathways with radical mechanisms: functional characterization using new analysis and information visualization methods. *Nucleic Acids Res.* **29**, 1097-1106 (2001).
4. Layer, G., Moser, J., Heinz, D.W., Jahn, D. & Schubert, W.-D. Crystal structure of coproporphyrinogen III oxidase reveals cofactor geometry of Radical SAM enzymes. *EMBO J.* **22**, 6214-6224 (2003).
5. Berkovitch, F., Nicolet, Y., Wan, J.T., Jarrett, J.T. & Drennan, C.L. Crystal structure of biotin synthase, an *S*-adenosylmethionine-dependent radical enzyme. *Science* **303**, 76-79 (2004).
6. Holm, L. & Rosenström, P. Dali server: conservation mapping in 3D. *Nucleic Acids Res.* **38**, W545-W549 (2010).
